# Supplementary material for: Ceria–zirconia encapsulated Ni nanoparticles for CO2 methanation
Source: Royal Society of Chemistry journal article supplement (doi:10.1039/c9cy01428d), 2019-01-01
Supplement: c9cy01428d1.pdf [file c9cy01428d1.pdf]

## Supplementary Information

# Ceria-Zirconia Encapsulated Ni Nanoparticles for CO<sub>2</sub> Methanation

Wilbert L. Vrijburg,<sup>a</sup> Jolanda W.A. van Helden,<sup>a</sup> Alexander Parastayev,<sup>a</sup> Esther Groeneveld,<sup>b</sup> Evgeny A. Pidko,<sup>a,#</sup> Emiel J.M. Hensen<sup>\*,a</sup>

<sup>a</sup> Laboratory of Inorganic Materials and Catalysis, Schuit Institute of Catalysis, Eindhoven University of Technology, P.O. Box 513, 5600 MB Eindhoven, The Netherlands

<sup>b</sup> BASF Nederland B.V., De Meern, The Netherlands

<sup>#</sup> Present address: Inorganic Systems Engineering group, Department of Chemical Engineering, Delft University of Technology, Van der Maasweg 9, 2629 HZ, Delft, The Netherlands

\* Corresponding authors. Email: e.j.m.hensen@tue.nl (E.J.M.H.)

## Supplementary Information

### 1.1 Synthesis methods

**Encapsulation of NiNPs in SiO<sub>2</sub>** was carried out according to a literature procedure by Savithra et al.<sup>1</sup> and is discussed extensively in our previous work.<sup>2</sup> Colloidal NiNPs (ca. 100 mg) were dispersed in 5 mL CHCl<sub>3</sub> and was slowly added to 20 mL aqueous CTAB solution (0.1 M) at room temperature. The transfer and stabilization of NiNPs from the organic to the aqueous phase was facilitated by heating the mixture to 75 °C and slowly evaporating the CHCl<sub>3</sub> for ca. 20 min to obtain a homogeneous black solution in contrast to the original cloudy brown mixture. The Ni/CTAB/H<sub>2</sub>O mixture was cooled to 50 °C and diluted with 130 mL deionized water, to which 2 mL NaOH solution (1 M) was added. In situ hydrolysis of SiO<sub>2</sub> was performed by injecting 2.7 mL TEOS to the Ni/CTAB/H<sub>2</sub>O solution dropwise over 5 min under stirring at 50 °C. The resulting gel-like mixture was stirred for 18 h. The product was isolated and centrifuge-washed 3 times with deionized water and 3 times with methanol. The product (Ni@SiO<sub>2</sub>) was dried in vacuo overnight.

In order to remove the organic ligands (OAm/OAc) and templating/stabilizing agent (CTAB), Ni@SiO<sub>2</sub> was calcined in 20 % O<sub>2</sub>/N<sub>2</sub> mixture (50 mL/min) at 500 °C (1 °C/min, 10 h). The oxidized NiO@SiO<sub>2</sub> nanoparticles were reduced at 600 °C in 10 % H<sub>2</sub>/He flow (5 °C/min, 6 h).

## 1.2 Additional results

### 1.2.1 Electron microscopy

Particle size distributions of unsupported NiNPs and mesoporous silica-encapsulated NiNPs were determined with TEM and HAADF-STEM respectively (Figure S1).

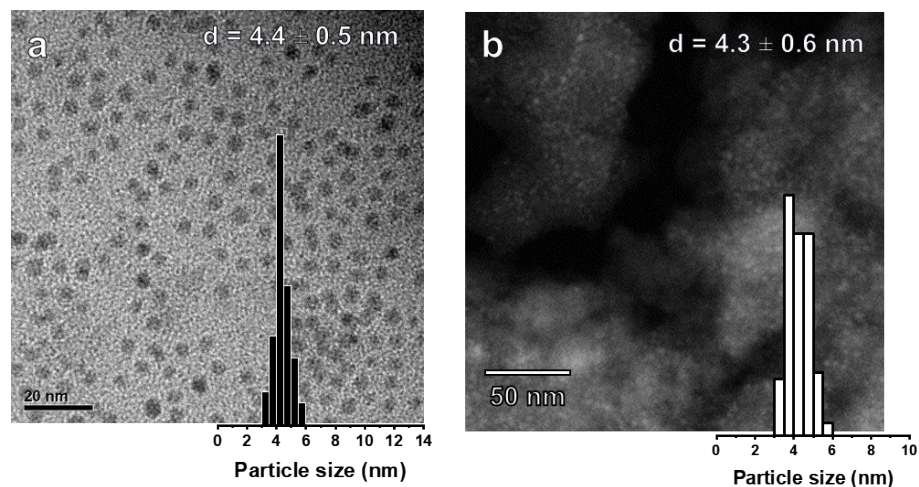

Figure S1: (a) TEM image and particle size distribution of colloidal NiNPs employed in this study. (b) HAADF-STEM image and particle size distribution of Ni(4.4)@SiO<sub>2</sub>.

A bright-field TEM image of the ceria-zirconia (CZ) prepared *via* sol-gel after calcination at 500 °C is presented in Figure S2. This measurement demonstrates that the CZ crystallites (ca. 6 nm) form larger aggregates that are observed with HAADF-STEM.

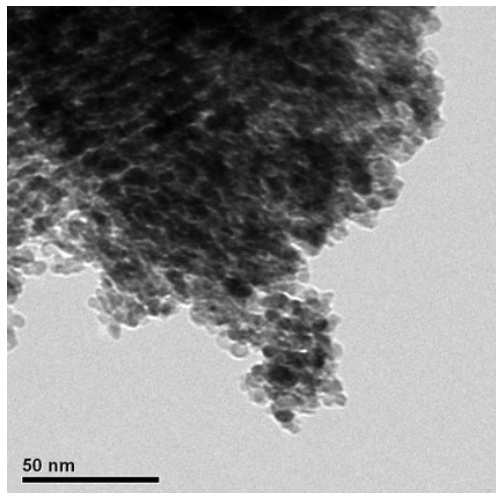

Figure S2: TEM image of ceria-zirconia prepared *via* sol-gel after calcination at 500 °C.

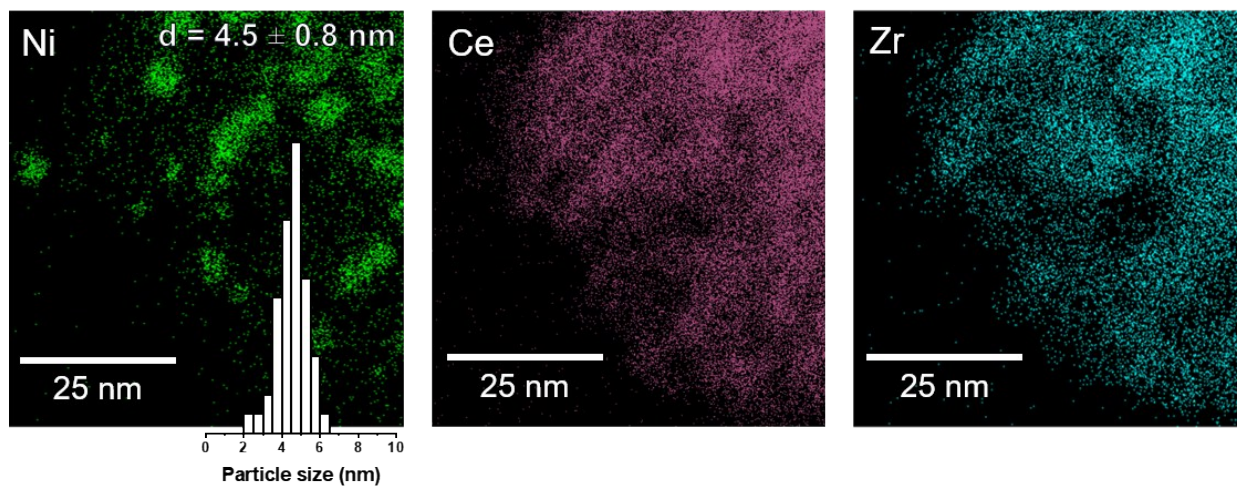

Figure S3: STEM-EDX mapping and particle size distributions of Ni(4.4)@CZ after reduction at 500 °C.

### 1.2.2 XPS

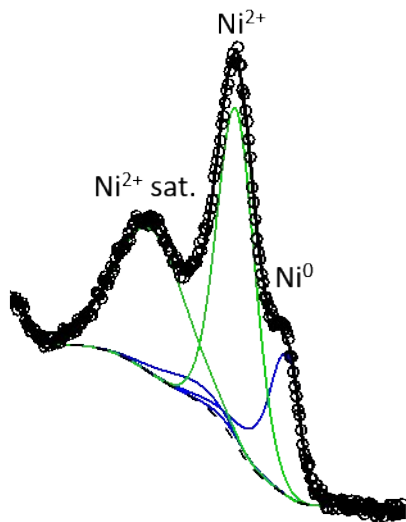

Figure S4: XP spectrum of colloidal NiNPs in Ni 2p region showing the presence of metallic Ni<sup>0</sup> (blue) and oxidic Ni<sup>2+</sup> (green).

### 1.2.3 XRD

XRD patterns of CZ after calcination at 500 °C and 800 °C were obtained to probe the stability of the CZ support. Figure S5 shows that the CZ remained phase-pure after calcination at elevated temperatures, although a slight narrowing of the XRD peaks indicated the slight aggregation of the CZ crystallites. For this reason, we calcined the Ni-CZ catalysts at 500 °C after synthesis.

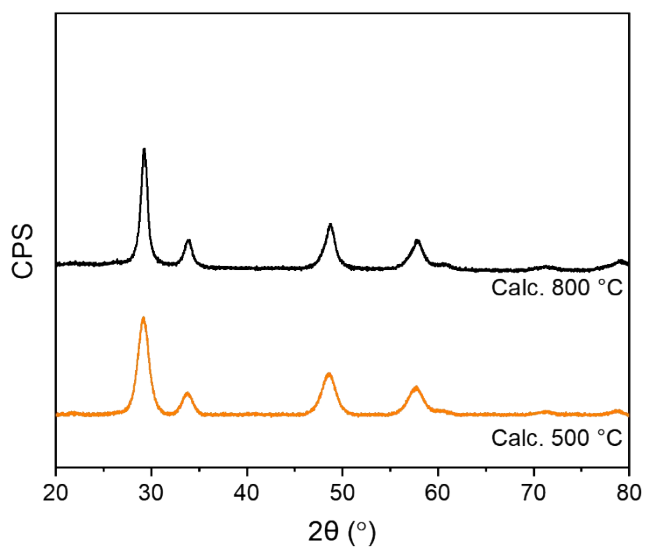

Figure S5: XRD patterns of CZ after calcination at 500 °C and 800 °C.

#### 1.2.4 N<sub>2</sub> physisorption

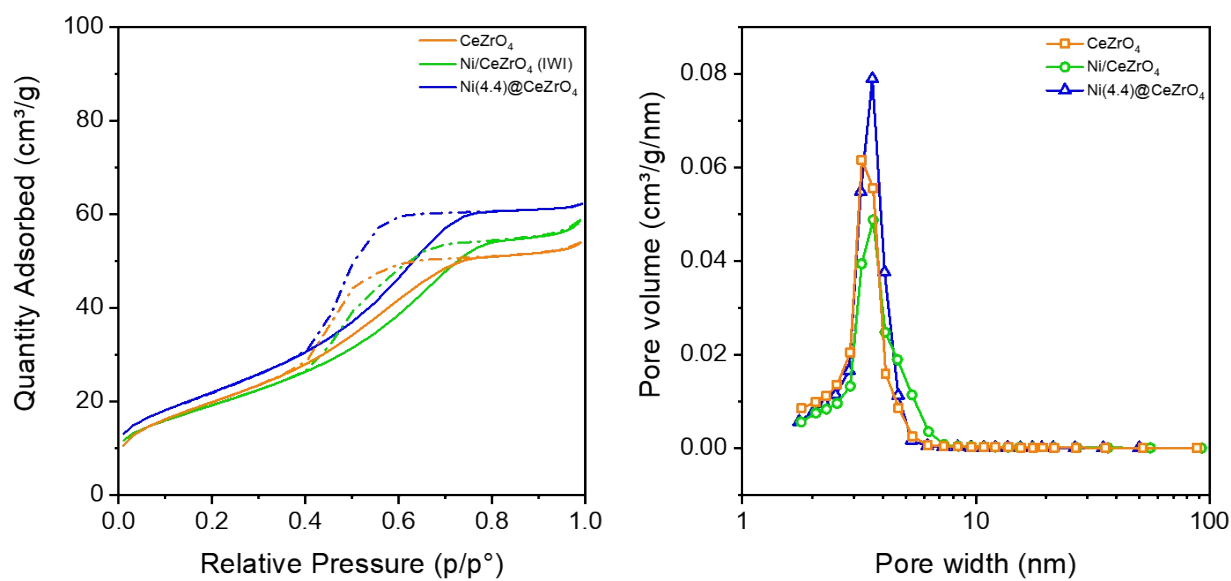

Figure S6: N<sub>2</sub> physisorption isotherms (left) and BJH pore-size distributions determined using the desorption branch of the isotherm (right).

### 1.2.5 Catalytic activity

Table S1: Kinetic results for supported catalysts for CO<sub>2</sub> methanation at 250 °C.

| Catalyst                 | T (°C) | Conversion (%) | CH <sub>4</sub> selectivity (%) | Rates (10 <sup>-3</sup> mol CH <sub>4</sub> /mol Ni/s) | TOF (10 <sup>-3</sup> mol CH <sub>4</sub> /mol active site/s) <sup>a</sup> | Ref.         |
|--------------------------|--------|----------------|---------------------------------|--------------------------------------------------------|----------------------------------------------------------------------------|--------------|
| Ni/CZ                    | 250    | 3.7            | 95                              | 2.35 (± 0.02)                                          | 9.61 (± 0.08)                                                              | This work    |
| Ni(4.4)@CZ               | 250    | 9.5            | 100                             | 6.15 (± 0.04)                                          | 29.3 (± 0.2)                                                               | This work    |
| Ni(4.4)@SiO <sub>2</sub> | 250    | 1.3            | 100                             | 0.64 (± 0.03)                                          | 7.0 (± 0.4)                                                                | <sup>2</sup> |

<sup>a</sup> Determined by H<sub>2</sub> chemisorption.

## References

- 1 G. H. Layan Savithra, E. Muthuswamy, R. H. Bowker, B. A. Carrillo, M. E. Bussell and S. L. Brock, *Chem. Mater.*, 2013, **25**, 825–833.
- 2 W. L. Vrijburg, J. W. A. van Helden, A. J. F. van Hoof, H. Friedrich, E. Groeneveld, E. A. Pidko and E. J. M. Hensen, *Catal. Sci. Technol.*, 2019, **9**, 2578–2591.
